# Supplementary material for: Rice Genome-Scale Network Integration Reveals Transcriptional Regulators of Grass Cell Wall Synthesis
Source: Front Plant Sci. 2019 Oct 18;10:1275. doi: 10.3389/fpls.2019.01275 (PMC6813959; doi:10.3389/fpls.2019.01275)
Supplement: Supplementary file 2 [file Table_1.xlsx]

## Sheet: Rice
Supplementary Table 1A. Summary of "bait" genes used to construct the cell wall networks in rice and Arabidopsis thaliana. Bold type and column C indicates genes that have been are characterized or putative grass cell wall-specific genes.
Locus ID	Name	"Grass specific" (see text for definition)
LOC_Os01g08380	OsAT6	Yes
LOC_Os01g09010	OsAT9	Yes
LOC_Os01g09550	OsSND3	No
LOC_Os01g18240	OsMYB61a	No
LOC_Os01g18744	OsAT4/OsPMT1	Yes
LOC_Os01g42870	OsAT2	Yes
LOC_Os01g42880	OsAT1	Yes
LOC_Os01g48130	OsSND2	No
LOC_Os01g48440	OsIRX9l	No
LOC_Os01g51260	OsMYB26	No
LOC_Os01g54620	OsCESA4	No
LOC_Os01g60450	OsC4H	No
LOC_Os01g67530	Os4CL	No
LOC_Os01g67540	Os4CL	No
LOC_Os01g70200	OsIRX10	No
LOC_Os02g08100	Os4CL3	No
LOC_Os02g09490	OsCAD2	No
LOC_Os02g22380	OsXAX1	Yes
LOC_Os02g39850	OsHCT	No
LOC_Os02g41630	OsPAL1	No
LOC_Os02g41650	OsPAL2	No
LOC_Os02g41670	OsPAL3	No
LOC_Os02g41680	OsPAL	No
LOC_Os02g42970	OsVND4/5	No
LOC_Os02g46780	OsMYB58/63a	No
LOC_Os02g46970	Os4CL2	No
LOC_Os02g57760	OsCOMT	No
LOC_Os03g02180	OsF5H1	No
LOC_Os03g03164	KNOR1/OsKNAT7	No
LOC_Os03g03540	OsVND1	No
LOC_Os03g04000	Os4CL	No
LOC_Os03g05780	Os4CL	No
LOC_Os03g12270	OsCAD9	No
LOC_Os03g51110	OsMYB52/54	No
LOC_Os03g51690	OsKNOTTED1	No
LOC_Os03g59340	OsCESA2	No
LOC_Os03g60380	OsCCR	No
LOC_Os03g62090	OsCESA5	No
LOC_Os04g01470	OsCOMT	No
LOC_Os04g09260	OsAT13	Yes
LOC_Os04g09590	OsAT12	Yes
LOC_Os04g11810	OsAT11	Yes
LOC_Os04g15920	OsCAD6	No
LOC_Os04g24530	Os4CL	No
LOC_Os04g42250	OsHCT	No
LOC_Os04g43760	OsPAL5	No
LOC_Os04g43800	OsPAL6	No
LOC_Os04g50770	OsMYB58/63b	No
LOC_Os04g52280	OsCAD7	No
LOC_Os05g04584	OsAT3	Yes
LOC_Os05g04820	OsMYB61b	No
LOC_Os05g08370	OsCESA1	No
LOC_Os05g08640	OsAT7	Yes
LOC_Os05g19910	OsAT5	Yes
LOC_Os05g25640	OsC4H	No
LOC_Os05g35170	OsVNI1	No
LOC_Os05g35290	OsPAL7	No
LOC_Os05g41440	OsC3'H	No
LOC_Os05g50080	OsC3'H14	No
LOC_Os06g01480	OsVND6/7	No
LOC_Os06g04090	OsSND1	No
LOC_Os06g06980	OsCCoAOMT	No
LOC_Os06g20570	OsXAT1	Yes
LOC_Os06g24180	OsF5H	No
LOC_Os06g39390	OsAT10	Yes
LOC_Os06g39470	OsAT8	Yes
LOC_Os06g39970	OsCESA11	No
LOC_Os06g40150	OsSHN2	No
LOC_Os06g41810	OsCCRlike	No
LOC_Os06g41840	OsCCRlike	No
LOC_Os06g44620	Os4CL4	No
LOC_Os06g47340	OsIRX14	No
LOC_Os06g48560	OsAT20	Yes
LOC_Os07g09050	OsGT47	No
LOC_Os07g10770	OsCESA8	No
LOC_Os07g14850	OsCESA6	No
LOC_Os07g17970	Os4CL	No
LOC_Os07g24190	OsCESA3	No
LOC_Os07g36630	OsCslF8	Yes
LOC_Os07g49370	OsIRX9	No
LOC_Os08g02300	OsNST1/2	No
LOC_Os08g04770	Os4CL	No
LOC_Os08g05520	OsMYB103	No
LOC_Os08g05790	OsCCoAOMT	No
LOC_Os08g06100	OsCOMT1	No
LOC_Os08g06380	OsCslF6	Yes
LOC_Os08g14760	Os4CL1	No
LOC_Os08g16910	OsCAD5	No
LOC_Os08g33150	OsMYB20/43a	No
LOC_Os08g34280	OsCCR1	No
LOC_Os08g34790	Os4CL5	No
LOC_Os08g38900	OsCCoAOMT	No
LOC_Os08g38910	OsCCoAOMT	No
LOC_Os08g38920	OsCCoAOMT	No
LOC_Os08g43550	OsMYB4/32a(aslo named as MYB42)	No
LOC_Os09g23530	OsCAD8	No
LOC_Os09g23620	OsMYB20/43b (aslo named as MYB31)	No
LOC_Os09g25150	OsCCR	No
LOC_Os09g25490	OsCESA9	No
LOC_Os09g30360	OsCCoAOMT	No
LOC_Os09g36250	OsMYB42/85	No
LOC_Os09g36730	OsMYB4/32b	No
LOC_Os10g01800	OsAT17	Yes
LOC_Os10g01920	OsAT15	Yes
LOC_Os10g01930	OsAT14	Yes
LOC_Os10g02000	OsAT16	Yes
LOC_Os10g03360	OsAT18	Yes
LOC_Os10g03390	OsAT19	Yes
LOC_Os10g11810	OsCAD1	No
LOC_Os10g20090	OsCslH1	Yes
LOC_Os10g29470	OsCAD3	No
LOC_Os10g32980	OsCESA7	No
LOC_Os10g36848	OsF5H	No
LOC_Os10g38834	OsVND2	No
LOC_Os10g42800	Os4CL	No
LOC_Os11g03300	OsVNI2	No
LOC_Os11g10130	OsMYB69	No
LOC_Os11g31090	OsHCT	No
LOC_Os11g40690	OsCAD4	No
LOC_Os11g48110	OsPAL8	No
LOC_Os12g09770	OsCOMT	No
LOC_Os12g13800	OsCOMT	No
LOC_Os12g29300	OsCESA10	No
LOC_Os12g33070	OsMYB46/83	No
LOC_Os12g33610	OsPAL9	No

## Sheet: Arabidopsis
Supplementary Table 1B. Summary of "bait" genes used to construct the cell wall networks in rice and Arabidopsis.
Locus ID	Name
At1g51680	At4CL1
At3g21240	At4CL2
At1g65060	At4CL3
At3g21230	At4CL4
At2g40890	AtC3H
At1g66810	AtC3H14
At2g30490	AtC4H
At4g39330	AtCAD1
At3g19450	AtCAD2
At4g37970	AtCAD3
At4g37980	AtCAD4
At4g37990	AtCAD5
At4g34230	AtCAD6
At2g21730	AtCAD7
At2g21890	AtCAD8
At1g72680	AtCAD9
At1g24735	AtCCoAOMT
At1g67990	AtCCoAOMT
At1g67980	AtCCoAOMT
At4g26220	AtCCoAOMT
At4g34050	AtCCoAOMT1
At1g15950	AtCCR1
At1g80820	AtCCR2
At4g32410	AtCESA1
At2g25540	AtCESA10
At4g39350	AtCESA2
At5g05170	AtCESA3
At5g44030	AtCESA4
At5g09870	AtCESA5
At5g64740	AtCESA6
At5g17420	AtCESA7
At4g18780	AtCESA8
At2g21770	AtCESA9
At5g54160	AtCOMT1
At4g36220	AtF5H
At5g04330	AtF5H
At5g48930	AtHCT
At1g27440	AtIRX10
At4g36890	AtIRX14
At2g37090	AtIRX9
At1g62990	AtKNAT7
At1g63910	AtMYB103
At1g66230	AtMYB20
At3g13890	AtMYB26
At4g34990	AtMYB32
At4g38620	AtMYB4
At4g12350	AtMYB42
At5g16600	AtMYB43
At5g12870	AtMYB46
At1g17950	AtMYB52
At1g73410	AtMYB54
At1g16490	AtMYB58
At1g09540	AtMYB61
At1g79180	AtMYB63
At4g33450	AtMYB69
At1g56650	AtMYB75
At3g08500	AtMYB83
At4g22680	AtMYB85
At2g46770	AtNST1
At3g61910	AtNST2
At2g37040	AtPAL1
At3g53260	AtPAL2
At5g04230	AtPAL3
At3g10340	AtPAL4
At1g32770	AtSND1
At4g28500	AtSND2
At1g28470	AtSND3
At2g18060	AtVND1
At4g36160	AtVND2
At5g66300	AtVND3
At1g12260	AtVND4
At1g62700	AtVND5
At5g62380	AtVND6
At1g71930	AtVND7
